# Supplementary material
Source: publisher figshare collection journal article supplement (https://tandf.figshare.com/ndownloader/files/14090183)
Supplement: Supplementary file 1 [file 14090183]

**Supporting information to the paper Drissen, T. et al. Plant composition and diversity in a semi-natural Mediterranean island landscape: the importance of environmental factors.**

**Supplement S1.** Vascular plant species recorded in the study. Given is the percentage frequency per vegetation unit (for abbreviations see ‘Floristic composition’ in the results). Species not documented for Asinara Island before in bold. Species not considered in CCA are marked with an asterisk. Nomenclature: Conti et al. (2005), except for *Olea europaea* var. *europaea* and var. *sylvestris*, which follow Pignatti (1982).

| **Vegetation unit** **Number of plots** |  | **COA**  **19** | **GRA**  **14** | **GRW**  **10** | **CIS**  **10** | **EUP**  **15** | **JUN**  **9** | **QUE**  **5** | **OLI**  **6** |
| --- | --- | --- | --- | --- | --- | --- | --- | --- | --- |
| *Agrostis pourretii* Willd. |  | . | . | 50 | 10 | . | . | . | . |
| *Agrostis stolonifera* L. |  | . | . | 20 | . | . | . | . | . |
| *Aira caryophyllea* L. subsp. *caryophyllea* |  | 5 | 7 | . | 20 | 7 | . | . | . |
| *Aira elegantissima* Schur |  | . | . | 10 | 20 | 7 | . | . | . |
| *Allium ampeloprasum* L. | * | . | . | . | . | . | . | 20 | . |
| *Allium commutatum* Guss. |  | 5 | 7 | . | . | . | . | . | . |
| *Allium parciflorum* Viv. | * | 5 | . | . | . | . | . | . | . |
| *Allium roseum* L. |  | 5 | 7 | . | . | . | . | . | . |
| *Allium subhirsutum* L. |  | . | . | . | 30 | 47 | 33 | 40 | . |
| *Allium triquetrum* L. |  | . | . | . | . | 20 | 11 | 80 | 50 |
| *Alopecurus bulbosus* Gouan |  | . | . | 20 | . | . | . | . | . |
| *Althaea hirsuta* L. |  | . | . | . | . | 20 | . | . | 17 |
| *Ammi majus* L. |  | . | 7 | 10 | . | 7 | . | . | . |
| *Anacyclus clavatus* (Desf.) Pers. |  | 11 | 43 | 10 | . | . | 11 | . | 17 |
| *Anagallis arvensis* L. subsp. *latifolia* (L.) Arcang. |  | 89 | 100 | 100 | 100 | 100 | 89 | 40 | 100 |
| *Anagallis foemina* Mill. | * | 5 | . | . | . | . | . | . | . |
| *Andryala integrifolia* L*.* |  | 58 | 7 | 20 | 80 | 87 | 11 | 20 | 67 |
| *Anemone hortensis* L. subsp. *hortensis* |  | 5 | . | . | 20 | . | 11 | 20 | . |
| *Anogramma leptophylla* (L.) Link |  | . | . | . | . | 27 | . | 100 | 50 |
| *Anthemis arvensis* L. subsp. *arvensis* |  | 5 | 64 | 20 | 20 | 20 | 11 | 20 | 50 |
| *Anthemis arvensis* L. subsp. *incrassata* (Loisel.) Nyman |  | 37 | 7 | 20 | 20 | 20 | 22 | . | . |
| *Anthoxanthum aristatum* Boiss. subsp. *aristatum* |  | 63 | 21 | 70 | 100 | 60 | 44 | . | 67 |
| *Apium nodiflorum* (L.) Lag. subsp. *nodiflorum* |  | . | 7 | 10 | . | . | . | . | . |
| ***Arenaria leptoclados* (Rchb.) Guss.** | * | . | . | . | . | . | 11 | . | . |
| *Arisarum vulgare* Targ. Tozz. |  | 95 | 21 | 10 | 100 | 100 | 78 | 100 | 100 |
| *Arum pictum* L. f. |  | . | . | . | . | . | 11 | . | 33 |
| *Asparagus acutifolius* L. |  | . | . | . | 20 | 20 | . | 20 | 50 |
| *Asparagus albus* L. |  | . | . | . | 10 | 20 | 11 | . | 33 |
| *Asphodelus ramosus* L. subsp. *ramosus* |  | 11 | 14 | . | 100 | 80 | 44 | . | 83 |
| *Asplenium obovatum* Viv. subsp. *obovatum* |  | . | . | . | . | 7 | . | 60 | 17 |
| *Asplenium onopteris* L. |  | . | . | . | . | 13 | . | 100 | . |
| *Asterolinon linum-stellatum* (L.) Duby |  | 16 | . | . | 90 | . | 22 | . | . |
| *Astragalus hamosus* L. |  | . | 14 | 10 | . | . | . | . | . |
| *Astragalus pelecinus* (L.) Barneby subsp. *pelecinus* |  | . | 50 | 10 | . | 7 | . | . | 17 |
| *Astragalus terraccianoi* Vals. | * | 5 | . | . | . | . | . | . | . |
| *Atractylis gummifera* L. |  | . | 14 | . | 10 | . | . | . | . |
| *Atriplex portulacoides* L. |  | 11 | . | . | . | . | 11 | . | . |
| *Avena barbata* Pott ex Link |  | 100 | 64 | 50 | 100 | 100 | 56 | . | 67 |
| *Avena fatua* L. |  | . | . | . | . | 7 | . | . | 17 |
| *Bartsia trixago* L. |  | 11 | 14 | . | 10 | . | . | . | . |
| *Bellium bellidioides* L. |  | 47 | . | . | . | . | 11 | . | . |
| *Blackstonia perfoliata* (L.) Huds. subsp. *imperfoliata* (L.f.) Franco & Rocha Afonso |  | . | . | . | . | . | 22 | . | . |
| *Borago officinalis* L. |  | 5 | . | . | . | 20 | . | . | 33 |
| *Brachypodium retusum* (Pers.) P. Beauv. |  | 74 | 7 | . | 60 | 47 | 22 | 20 | 33 |
| *Brassica nigra* (L.) W.D.J. Koch |  | . | 7 | . | . | . | 11 | . | 17 |
| *Briza maxima* L. |  | 74 | 21 | 40 | 100 | 93 | 44 | . | 67 |
| *Briza minor* L. |  | . | . | 60 | 20 | . | . | . | . |
| *Bromus diandrus* Roth subsp. *maximus* (Desf.) Soó |  | 37 | . | 10 | 10 | 33 | 56 | . | 17 |
| *Bromus hordeaceus* L. subsp. *hordeaceus* |  | 68 | 86 | 100 | 30 | 33 | 33 | . | 33 |
| *Bromus madritensis* L. |  | 68 | 29 | 20 | 70 | 80 | 56 | . | 67 |
| *Bromus rubens* L. |  | 16 | 7 | . | 30 | 13 | . | . | 17 |
| *Bryonia marmorata* Petit |  | . | . | . | 10 | . | 22 | . | 17 |
| *Bunias erucago* L. |  | . | 7 | . | . | . | 11 | . | . |
| *Bupleurum semicompositum* L. |  | 47 | . | . | . | 7 | 67 | . | 17 |
| *Calendula arvensis* L. |  | 21 | 86 | 10 | 40 | 47 | 11 | . | 67 |
| *Calicotome spinosa* (L.) Link |  | 5 | . | . | 10 | . | . | . | . |
| *Calicotome villosa* (Poir.) Link |  | 21 | . | . | 30 | 67 | 33 | 40 | 67 |
| *Camphorosma monspeliaca* L. |  | 58 | 7 | . | . | . | 11 | . | . |
| *Capsella rubella* Reut. |  | . | 21 | . | . | 7 | . | . | 33 |
| *Cardamine hirsuta* L. |  | . | . | . | 20 | 40 | 11 | 100 | 33 |
| *Carduus pycnocephalus* L. subsp. *pycnocephalus* |  | . | 36 | . | . | 7 | 22 | 20 | 33 |
| *Carex distachya* Desf. |  | . | . | . | . | . | . | 40 | . |
| *Carex divisa* Huds. |  | . | . | 60 | . | . | . | . | . |
| *Carex divulsa* Stokes |  | . | . | . | . | . | . | 60 | . |
| *Carex flacca* Schreb. s.l. | * | . | . | 10 | . | . | . | . | . |
| *Carex vulpina* L. |  | . | . | 20 | . | . | . | . | . |
| *Carlina corymbosa* L. |  | 84 | 86 | 10 | 50 | 27 | 11 | . | . |
| *Carlina lanata* L. |  | 5 | 21 | 10 | 40 | 27 | 11 | 20 | . |
| *Carthamus lanatus* L. subsp. *lanatus* |  | 5 | 36 | 30 | . | 7 | . | . | . |
| ***Castellia tuberculosa* (Moris) Bor** | * | . | . | . | . | 7 | . | . | . |
| *Catapodium balearicum* (Willk.) H. Scholz |  | 74 | 14 | . | 20 | 7 | 44 | . | . |
| *Catapodium rigidum* (L.) C.E. Hubb. ex Dony subsp. *rigidum* |  | . | 21 | . | 50 | 20 | 22 | 100 | . |
| *Centaurea calcitrapa* L. |  | . | 36 | . | 10 | . | 11 | . | . |
| *Centaurea horrida* Badarò |  | 53 | . | . | . | . | . | . | . |
| *Centaurium erythraea* Rafn subsp. *erythraea* |  | 26 | 7 | 30 | 10 | . | . | . | . |
| *Centaurium maritimum* (L.) Fritsch |  | 37 | 7 | 60 | 40 | 13 | 22 | . | . |
| *Centaurium pulchellum* (Sw.) Druce subsp. *pulchellum* |  | . | . | . | . | . | 22 | . | . |
| *Centranthus calcitrapae* (L.) Dufr. subsp. *calcitrapae* |  | 21 | . | . | 70 | 93 | 67 | 40 | 67 |
| *Cerastium glomeratum* Thuill. |  | 26 | 93 | 70 | 50 | 53 | 44 | . | 50 |
| *Cerastium semidecandrum* L. |  | . | 7 | . | . | . | 11 | . | . |
| *Chamaemelum fuscatum* (Brot.) Vasc. |  | 47 | 7 | 100 | 20 | 27 | 11 | . | 17 |
| *Charybdis maritima* (L.) Speta |  | . | . | 20 | . | . | . | 20 | . |
| *Charybdis undulata* (Desf.) Speta | * | . | . | . | 10 | . | . | . | . |
| *Chenopodium album* L. s.l. |  | . | . | . | . | 13 | . | . | . |
| *Chenopodium murale* L. |  | 11 | 14 | . | . | 13 | 78 | . | 33 |
| *Chenopodium urbicum* L. |  | . | . | 10 | . | . | 11 | . | . |
| *Cichorium intybus* L. s.l. |  | . | 29 | . | . | 7 | . | . | . |
| *Cistus monspeliensis* L. |  | 5 | . | . | 100 | 73 | 22 | . | 33 |
| *Clematis cirrhosa* L. |  | . | . | . | . | 20 | 11 | . | 67 |
| *Colchicum neapolitanum* (Ten.) Ten. | * | 5 | . | . | . | . | . | . | . |
| *Coleostephus myconis* (L.) Cass. ex Rchb. f. |  | . | 36 | 50 | . | . | . | . | . |
| *Convolvulus althaeoides* L. |  | . | . | . | 20 | . | . | . | . |
| *Convolvulus arvensis* L. |  | . | 71 | 20 | . | . | . | . | . |
| *Convolvulus siculus* L. s.l. |  | . | . | . | 10 | 40 | 11 | . | 33 |
| *Crepis bellidifolia* Loisel. |  | 79 | . | . | 10 | . | 44 | . | . |
| *Crepis biennis* L. |  | 32 | 29 | 10 | 10 | 7 | 22 | . | . |
| *Crepis foetida* L. |  | 32 | 29 | 10 | 40 | 47 | 56 | . | 33 |
| *Crepis leontodontoides* All. |  | 26 | 21 | . | 30 | . | 33 | 20 | . |
| *Crithmum maritimum* L. | * | . | . | . | . | . | 11 | . | . |
| *Cuscuta planiflora* Ten. |  | 21 | . | . | 10 | 13 | 11 | . | . |
| *Cyclamen repandum* Sm. subsp. *repandum* |  | . | . | . | . | . | . | 100 | . |
| *Cynodon dactylon* (L.) Pers. |  | 26 | 36 | . | . | . | 11 | . | . |
| *Cynoglossum creticum* Mill. |  | 5 | 14 | . | . | . | 11 | . | 17 |
| *Cynosurus cristatus* L. | * | . | . | 10 | . | . | . | . | . |
| *Cynosurus echinatus* L. |  | 37 | 86 | 50 | 80 | 93 | 44 | . | 83 |
| *Cynosurus effusus* Link |  | . | . | 10 | 30 | 7 | . | 80 | 33 |
| *Cyperus longus* L. |  | . | . | 40 | . | . | . | . | . |
| *Cytinus hypocistis* (L.) L. |  | . | . | . | 80 | 7 | 11 | . | . |
| *Dactylis glomerata* L. subsp. *hispanica* (Roth) Nyman |  | 100 | 29 | . | 80 | 13 | 56 | . | . |
| *Daphne gnidium* L. |  | 5 | . | . | 10 | . | . | . | . |
| *Dasypyrum villosum* (L.) P. Candargy, non Borbás |  | . | 29 | 10 | 10 | 13 | . | . | 17 |
| *Daucus carota* L. subsp. *carota* |  | 42 | 43 | . | 50 | 7 | 22 | . | . |
| *Daucus carota* L. subsp. *drepanensis* (Arcang.) Heywood |  | 11 | . | . | . | . | . | . | . |
| *Daucus carota* L. subsp. *hispanicus* (Gouan) Thell. | * | 5 | . | . | . | . | . | . | . |
| *Dittrichia graveolens* (L.) Greuter |  | . | 21 | 40 | . | . | . | . | . |
| *Dittrichia viscosa* (L.) Greuter s.l. |  | 11 | . | 40 | . | . | 11 | . | . |
| *Echium parviflorum* Moench |  | . | 21 | 40 | 20 | 7 | . | . | 33 |
| *Echium plantagineum* L. |  | . | 57 | 70 | 10 | 20 | . | . | 17 |
| *Eleocharis palustris* (L.) Roem. & Schult. subsp. *palustris* | * | . | . | 10 | . | . | . | . | . |
| *Elymus athericus* (Link) Kerguélen | * | . | . | 10 | . | . | . | . | . |
| *Erodium chium* (L.) Willd. | * | . | . | . | . | . | 11 | . | . |
| *Erodium ciconium* (L.) L'Hér. |  | . | . | 30 | . | . | . | . | . |
| *Erodium cicutarium* (L.) L'Hér. | * | . | . | . | . | . | 11 | . | . |
| *Erodium corsicum* Léman |  | 16 | . | . | . | . | . | . | . |
| *Erodium moschatum* (L.) L'Hér. |  | . | 93 | 10 | 10 | 7 | . | . | . |
| *Eryngium campestre* L. | * | . | 7 | . | . | . | . | . | . |
| *Eryngium maritimum* L. |  | 5 | 36 | . | . | . | . | . | . |
| *Euphorbia characias* L. |  | 11 | . | . | 10 | 7 | . | . | . |
| *Euphorbia dendroides* L. |  | . | . | 10 | 20 | 93 | 56 | . | 83 |
| *Euphorbia exigua* L. subsp. *exigua* |  | . | 7 | . | 10 | . | 11 | . | . |
| *Euphorbia helioscopia* L. subsp. *helioscopia* |  | . | 50 | 30 | . | 20 | . | . | . |
| *Euphorbia paralias* L. | * | . | . | . | . | . | 11 | . | . |
| *Euphorbia peplus* L. |  | 53 | 21 | . | 70 | 87 | 67 | . | 33 |
| *Euphorbia pithyusa* L. subsp. *pithyusa* |  | 89 | 14 | 10 | . | . | 22 | . | . |
| *Euphorbia pterococca* Brot. |  | 5 | . | . | . | 13 | 22 | 20 | . |
| *Ferula communis* L. |  | 26 | . | 10 | 70 | 73 | 56 | 20 | 83 |
| *Filago gallica* L. |  | 84 | 14 | . | 100 | 7 | 22 | . | . |
| *Filago pygmaea* L. |  | 32 | 29 | . | . | 7 | 22 | . | . |
| *Filago pyramidata* L. |  | 16 | 21 | 20 | 40 | 13 | . | . | . |
| *Filago tyrrhenica* Chrtek & Holub ex Soldano & F. Conti |  | 16 | . | . | . | . | 11 | . | . |
| *Filago vulgaris* Lam. |  | . | . | . | . | 7 | . | . | 17 |
| *Frankenia laevis* L. subsp. *laevis* |  | 26 | . | . | . | . | . | . | . |
| *Fumaria capreolata* L. subsp. *capreolata* |  | 74 | 14 | 10 | 70 | 100 | 100 | 80 | 100 |
| *Galactites elegans* (All.) Soldano |  | 53 | 64 | 80 | 100 | 93 | 44 | 20 | 100 |
| *Galium aparine* L. |  | . | . | 10 | . | 53 | 56 | 60 | 83 |
| *Galium murale* (L.) All. |  | 5 | 14 | . | . | 7 | 22 | . | . |
| *Galium verrucosum* Huds. s.l. |  | 84 | 14 | . | 90 | 47 | 56 | . | 33 |
| *Gastridium ventricosum* (Gouan) Schinz & Thell. |  | 53 | 79 | 30 | 100 | 80 | 56 | . | 50 |
| *Gaudinia fragilis* (L.) P. Beauv. |  | 37 | 14 | 70 | 10 | 13 | 33 | . | 33 |
| *Genista corsica* (Loisel.) DC. |  | 11 | . | . | . | . | . | . | . |
| *Geranium dissectum* L. |  | . | . | 80 | . | . | . | . | 17 |
| *Geranium molle* L. |  | 74 | 100 | 20 | 60 | 87 | 67 | 20 | 83 |
| *Geranium purpureum* Vill. |  | 11 | . | . | 70 | 100 | 78 | 100 | 100 |
| *Glebionis coronaria* (L.) Spach |  | . | 14 | . | . | . | . | . | . |
| *Gynandriris sisyrinchium* (L.) Parl. |  | 21 | 43 | 20 | . | . | 22 | . | . |
| *Hainardia cylindrica* (Willd.) Greuter | * | . | . | . | . | . | 11 | . | . |
| *Hedypnois cretica* (L.) Dum.Cours. |  | 53 | 100 | 50 | 60 | 53 | 44 | . | 67 |
| *Helichrysum italicum* (Roth) G. Don subsp. *microphyllum* (Willd.) Nyman |  | 100 | 21 | . | 20 | . | 11 | . | . |
| *Heliotropium europaeum* L. | * | . | . | 10 | . | . | . | . | . |
| *Hirschfeldia incana* (L.) Lagr.-Foss. subsp. *incana* |  | . | 21 | . | . | 7 | . | . | 17 |
| *Hordeum marinum* Huds. subsp. *marinum* |  | . | . | 80 | . | . | . | . | . |
| *Hordeum murinum* L. subsp. *leporinum* (Link) Arcang. |  | 53 | 100 | 50 | . | 53 | 44 | . | 83 |
| *Hyoseris scabra* L. |  | . | . | . | . | 7 | 11 | . | . |
| *Hyparrhenia hirta* (L.) Stapf subsp. *hirta* | * | . | . | . | . | . | 11 | . | . |
| *Hypochaeris achyrophorus* L. |  | 100 | 93 | 50 | 100 | 100 | 100 | 40 | 100 |
| *Hypochaeris glabra* L. |  | 32 | 14 | 40 | 60 | 33 | 22 | . | . |
| *Hypochaeris radicata* L. |  | 11 | 43 | 10 | 20 | . | 11 | . | . |
| *Isolepis cernua* (Vahl) Roem. & Schult. |  | . | . | 30 | . | . | . | . | . |
| *Juncus acutus* L.subsp. *acutus* | * | 5 | . | . | . | . | . | . | . |
| *Juncus bufonius* L. |  | 11 | 7 | 80 | 10 | . | . | . | . |
| *Juncus capitatus* Weigel |  | . | 7 | 30 | . | . | . | . | . |
| *Juncus hybridus* Brot. |  | 5 | 14 | 60 | . | . | . | . | . |
| *Juncus pygmaeus* Rich. ex Thuill. |  | . | 14 | . | . | . | . | . | . |
| *Juniperus phoenicea* L. subsp. *turbinata* (Guss.) Nyman |  | 11 | . | . | . | 7 | 100 | . | 17 |
| *Kickxia commutata* (Bernh. ex Rchb.) Fritsch s.l. |  | . | . | 20 | . | . | . | . | . |
| *Lagurus ovatus* L. subsp. *ovatus* |  | 95 | 86 | 30 | 90 | 93 | 89 | . | 100 |
| *Lamarckia aurea* (L.) Moench |  | . | 21 | . | . | 13 | . | . | 17 |
| *Lamium bifidum* Cirillo s.l. |  | . | . | . | . | . | 11 | 60 | . |
| ***Lathyrus angulatus* L.** |  | . | . | . | 30 | . | . | . | . |
| *Lathyrus aphaca* L. subsp. *aphaca* |  | 5 | . | . | . | 7 | 11 | . | . |
| *Lathyrus cicera* L. |  | . | . | . | 20 | 7 | . | . | . |
| *Lathyrus clymenum* L. |  | 5 | . | 10 | 40 | 47 | . | . | . |
| *Lathyrus sphaericus* Retz. |  | . | . | . | 20 | . | 11 | 20 | . |
| *Lavandula stoechas* L. subsp*. stoechas* | * | . | . | . | 10 | . | . | . | . |
| *Lavatera cretica* L. |  | . | 50 | 20 | . | 13 | 11 | . | 33 |
| *Legousia falcata* (Ten.) Janch. |  | . | . | . | . | . | . | 60 | . |
| *Leontodon tuberosus* L. |  | 5 | . | 20 | 10 | . | . | . | . |
| *Limbarda crithmoides* (L.) Dumort. s.l. | * | . | . | 10 | . | . | . | . | . |
| *Limonium acutifolium* (Rchb.) Salmon |  | 26 | . | . | . | . | 11 | . | . |
| *Linaria pelisseriana* (L.) Mill. |  | 16 | 14 | . | 80 | 13 | 11 | . | . |
| *Linum bienne* Mill. |  | . | . | 50 | . | 7 | . | . | . |
| *Linum strictum* L. s.l. |  | 26 | . | . | 20 | 20 | 44 | . | . |
| *Linum trigynum* L. |  | 37 | 7 | . | 80 | 40 | 11 | . | 17 |
| *Lobularia maritima* (L.) Desv. subsp. *maritima* |  | 63 | 14 | 10 | 40 | 47 | 33 | . | 50 |
| *Lolium perenne* L. |  | 58 | 36 | 80 | 20 | 27 | 33 | . | 33 |
| *Lolium rigidum* Gaudin s.l. |  | 68 | 79 | 70 | 20 | 27 | 56 | . | 33 |
| *Lotus angustissimus* L. |  | . | . | 80 | 10 | 27 | 11 | . | 33 |
| *Lotus corniculatus* L. subsp. *corniculatus* |  | 5 | . | 10 | . | . | . | . | . |
| *Lotus cytisoides* L. s.l. |  | 89 | 7 | 10 | . | . | 44 | . | . |
| *Lotus edulis* L. |  | 84 | 36 | 30 | 80 | 67 | 33 | . | 50 |
| *Lotus ornithopodioides* L. |  | 5 | 36 | . | 50 | 67 | 22 | . | 33 |
| *Lotus parviflorus* Desf. |  | 11 | . | 10 | 30 | 13 | . | . | . |
| *Lupinus gussoneanus* Agardh |  | 11 | . | . | 10 | . | . | . | . |
| *Lythrum hyssopifolia* L. |  | 5 | 7 | 40 | . | . | 11 | . | 17 |
| *Magydaris pastinacea* (Lam.) Paol. |  | 5 | . | . | . | . | . | . | 17 |
| *Malva parviflora* L. |  | 5 | 21 | 10 | . | 20 | 11 | . | 17 |
| *Matthiola tricuspidata* (L.) R. Br. |  | 5 | . | . | . | . | 22 | . | . |
| *Medicago arabica* (L.) Huds. |  | . | . | 40 | 10 | 20 | . | 20 | 17 |
| *Medicago intertexta* (L.) Mill. | * | . | 7 | . | . | . | . | . | . |
| *Medicago littoralis* Loisel. |  | 5 | . | . | 10 | 7 | 11 | . | . |
| *Medicago minima* (L.) L. |  | 16 | . | . | 30 | . | 11 | . | 17 |
| *Medicago murex* Willd. |  | 11 | 7 | 60 | 30 | 27 | 22 | . | 17 |
| *Medicago orbicularis* (L.) Bartal. |  | . | 7 | . | 10 | 13 | 11 | . | 17 |
| *Medicago polymorpha* L. |  | 5 | 71 | 90 | 50 | 47 | 33 | 20 | 33 |
| *Medicago rugosa* Desr. |  | . | 29 | . | . | . | . | . | . |
| *Medicago truncatula* Gaertn. |  | 21 | 57 | 20 | 40 | 40 | 56 | . | 50 |
| *Melica ciliata* L. subsp. *ciliata* |  | . | . | . | . | 33 | . | . | 33 |
| *Melica ciliata* L. subsp. *magnolii* (Gren. & Godr.) Husn. | * | . | . | . | 10 | . | . | . | . |
| *Melica minuta* L. | * | . | . | . | . | . | . | 20 | . |
| *Melilotus siculus* (Turra) Steud. |  | . | . | 20 | . | . | . | . | . |
| *Melilotus sulcatus* Desf. |  | . | 14 | 20 | . | . | 11 | . | 17 |
| *Mentha pulegium* L. subsp. *pulegium* |  | . | . | 60 | . | . | . | . | . |
| *Mercurialis annua* L. |  | . | . | . | . | 67 | 22 | . | 50 |
| *Misopates orontium* (L.) Raf. subsp. *orontium* |  | 5 | . | . | 70 | 60 | 11 | . | 33 |
| *Montia fontana* L. s.l. | * | . | . | 10 | . | . | . | . | . |
| *Muscari comosum* (L.) Mill. |  | 5 | 14 | . | 10 | . | . | . | . |
| *Myosotis ramosissima* Rochel ex Schult. subsp*. ramosissima* |  | . | . | 10 | . | . | . | 40 | . |
| *Nananthea perpusilla* (Loisel.) DC. | * | 5 | . | . | . | . | . | . | . |
| *Oenanthe crocata* L. |  | . | . | . | . | . | . | 20 | 17 |
| *Olea europaea* L. var. *europaea* |  | . | . | . | . | 40 | 22 | 20 | 100 |
| *Olea europaea* L. var. *sylvestris* Brot. |  | 5 | . | . | 30 | 13 | . | . | 67 |
| *Ononis reclinata* L. |  | 11 | . | . | 90 | 40 | 33 | . | . |
| *Ornithogalum corsicum* Jord. & Fourr. | * | 5 | . | . | . | . | . | . | . |
| *Ornithopus compressus* L. |  | 5 | 29 | 40 | 80 | 47 | . | 20 | 33 |
| *Ornithopus pinnatus* (Mill.) Druce |  | 11 | . | 50 | 20 | 13 | . | . | . |
| *Orobanche amethystea* Thuill. subsp. *amethystea* | * | . | . | . | 10 | . | . | . | . |
| *Orobanche crenata* Forssk. |  | 16 | . | . | . | . | . | . | . |
| *Orobanche elatior* Sutton |  | 11 | . | . | . | . | . | . | . |
| *Orobanche minor* Sm. |  | 53 | 21 | 20 | 20 | 13 | . | . | 17 |
| *Oxalis pes-caprae* L. |  | . | 7 | . | . | . | 11 | . | 17 |
| *Pancratium illyricum* L. |  | . | . | . | . | . | . | . | 33 |
| *Papaver dubium* L. s.l. | * | . | . | . | . | 7 | . | . | . |
| *Parapholis incurva* (L.) C.E. Hubb. |  | 11 | 7 | . | . | . | . | . | . |
| *Parentucellia viscosa* (L.) Caruel |  | 16 | 36 | 70 | 10 | . | 11 | . | . |
| *Parietaria judaica* L. |  | 5 | . | . | . | 53 | 89 | 60 | 67 |
| *Parietaria lusitanica* L. subsp. *lusitanica* |  | . | . | . | . | 13 | 11 | . | 17 |
| *Paronychia echinulata* Chater |  | 37 | 7 | . | 20 | 20 | 11 | . | 17 |
| *Paspalum distichum* L. |  | . | . | 100 | . | . | . | . | . |
| *Petrorhagia dubia* (Raf.) G. López & Romo |  | . | 21 | 10 | 30 | 13 | . | . | 33 |
| *Petrorhagia prolifera* (L.) P.W. Ball & Heywood |  | . | 7 | . | 10 | 20 | 11 | . | . |
| *Phagnalon rupestre* (L.) DC. s.l. | * | . | . | . | . | 7 | . | . | . |
| *Phagnalon saxatile* (L.) Cass. | * | . | . | . | 10 | . | . | . | . |
| *Phalaris canariensis* L. |  | . | 7 | 10 | . | . | . | . | . |
| *Phalaris minor* Retz. |  | . | 50 | 10 | . | . | . | . | . |
| *Phedimus stellatus* (L.) Raf. |  | . | . | . | . | 20 | . | . | 17 |
| *Piptatherum miliaceum* (L.) Coss. s.l. |  | 5 | . | . | 10 | 40 | 67 | . | 17 |
| *Pistacia lentiscus* L. |  | 63 | 7 | 10 | 80 | 93 | 100 | . | 100 |
| *Pisum sativum* L. s.l. |  | . | . | . | . | 7 | . | . | 33 |
| *Plantago afra* L. s.l. |  | 5 | . | . | 10 | . | 11 | . | . |
| *Plantago bellardii* All. |  | 21 | . | . | 60 | 20 | 11 | . | . |
| *Plantago coronopus* L. subsp. *coronopus* |  | 68 | 50 | 70 | . | . | 22 | . | . |
| *Plantago lagopus* L. |  | 11 | 100 | 80 | 40 | 33 | 11 | . | 17 |
| *Plantago lanceolata* L. |  | 37 | 7 | 50 | 20 | 13 | . | . | 17 |
| *Poa annua* L. |  | 16 | 71 | 40 | 10 | 7 | . | . | 17 |
| *Poa trivialis* L. |  | . | . | 30 | . | . | . | 80 | . |
| *Polycarpon tetraphyllum* (L.) L. s.l. |  | 53 | 93 | 20 | 50 | 53 | 44 | . | 83 |
| *Polypodium cambricum* L. |  | . | . | . | . | 7 | . | 60 | 17 |
| *Polypogon maritimus* Willd. |  | 37 | 7 | 10 | . | . | 11 | . | . |
| *Polypogon monspeliensis* (L.) Desf. |  | . | . | 30 | . | . | . | . | . |
| *Polypogon viridis* (Gouan) Breistr. |  | 11 | . | 30 | . | . | . | . | . |
| *Prasium majus* L. |  | 32 | . | . | 50 | 93 | 78 | . | 83 |
| *Prospero obtusifolia* (Poir.) Speta subsp. *intermedia* (Guss.) Soldano & F. Conti |  | 11 | . | . | . | . | . | . | . |
| *Pulicaria odora* (L.) Rchb. |  | . | 7 | . | 10 | . | . | 20 | 17 |
| *Quercus ilex* L. subsp. *ilex* |  | . | . | . | . | 7 | . | 100 | . |
| *Ranunculus cordiger* Viv. subsp. *cordiger* | * | . | . | 10 | . | . | . | . | . |
| *Ranunculus muricatus* L. |  | . | 43 | 100 | 10 | 7 | . | . | 17 |
| *Ranunculus parviflorus* L. |  | . | . | . | . | . | 11 | 40 | . |
| *Ranunculus sardous* Crantz s.l. |  | . | . | 80 | . | . | . | . | . |
| *Raphanus raphanistrum* L. s.l. |  | . | 71 | 50 | 10 | 33 | . | . | 17 |
| *Reichardia picroides* (L.) Roth |  | 89 | 14 | . | 30 | 13 | 11 | . | . |
| *Rhagadiolus stellatus* (L.) Gaertn. |  | . | . | . | . | . | 22 | 20 | . |
| *Romulea requienii* Parl. |  | 26 | . | 50 | 10 | . | . | . | . |
| *Rostraria cristata* (L.) Tzvelev s.l. |  | 5 | 57 | 20 | . | 27 | . | . | . |
| *Rostraria litorea* (All.) Holub |  | 47 | 29 | . | 30 | 13 | 33 | . | . |
| *Rubia peregrina* L. s.l. |  | 5 | . | . | . | 40 | 44 | 20 | . |
| *Rubus ulmifolius* Schott |  | 5 | . | . | . | 13 | . | 80 | 33 |
| *Rumex bucephalophorus* L. subsp. *bucephalophorus* |  | 89 | 21 | 10 | 40 | 13 | 44 | . | . |
| *Rumex conglomeratus* Murray |  | . | 43 | 30 | . | 7 | . | . | . |
| *Rumex crispus* L. |  | . | 14 | 10 | . | . | 11 | . | . |
| *Rumex pulcher* L. subsp. *pulcher* |  | . | 21 | 60 | . | . | . | . | 17 |
| *Ruta chalepensis* L. |  | . | . | . | 30 | 40 | 56 | . | 50 |
| *Sagina apetala* Ard. subsp. *apetala* |  | 5 | 14 | . | . | . | . | . | . |
| *Sagina maritima* G. Don |  | 26 | 7 | . | . | . | . | . | . |
| *Salvia verbenaca* L. |  | . | 21 | . | . | . | . | . | . |
| *Sanguisorba minor* Scop. s.l. | * | 5 | . | . | . | . | . | . | . |
| *Scandix pecten-veneris* L. s.l. | * | 5 | . | . | . | . | . | . | . |
| *Schoenus nigricans* L. | * | 5 | . | . | . | . | . | . | . |
| *Scorpiurus muricatus* L. |  | 21 | 43 | 10 | 100 | 27 | . | . | . |
| *Scrophularia peregrina* L. |  | . | . | . | . | 20 | 11 | 20 | 83 |
| *Sedum litoreum* Guss. | * | . | . | . | . | 7 | . | . | . |
| *Sedum rubens* L. |  | 42 | . | 10 | . | 27 | 33 | . | . |
| *Selaginella denticulata* (L.) Spring |  | 5 | . | . | 10 | . | 22 | 80 | 17 |
| *Senecio leucanthemifolius* Poir. subsp. *leucanthemifolius* |  | 84 | 7 | . | 20 | 20 | 67 | 20 | . |
| *Senecio lividus* L. |  | 21 | . | . | 70 | 87 | 67 | 80 | 83 |
| *Senecio vulgaris* L. |  | 21 | 36 | . | 20 | 20 | 22 | . | 17 |
| *Sherardia arvensis* L. |  | 37 | 100 | 60 | 100 | 87 | 44 | . | 67 |
| *Sideritis romana* L. subsp. *romana* |  | 5 | 7 | . | 20 | 53 | 11 | . | 50 |
| *Silene coelirosa* (L.) Godr. | * | . | . | . | . | . | 11 | . | . |
| *Silene gallica* L. |  | 100 | 100 | 100 | 100 | 100 | 56 | . | 67 |
| *Silene laeta* (Aiton) Godr. |  | 11 | . | 80 | 10 | . | . | . | . |
| *Silene sericea* All. |  | 53 | . | . | . | . | 33 | . | . |
| *Silene vulgaris* (Moench) Garcke s.l. | * | . | 7 | . | . | . | . | . | . |
| *Sisymbrium officinale* (L.) Scop. |  | . | 7 | . | . | 27 | 11 | 40 | 33 |
| *Smilax aspera* L. |  | 5 | . | . | . | . | . | . | 17 |
| *Solanum nigrum* L. |  | 5 | . | . | 10 | 40 | 11 | . | 83 |
| *Sonchus arvensis* L. s.l. |  | 26 | 14 | 20 | 60 | 33 | 56 | . | 50 |
| *Sonchus asper* (L.) Hill s.l. |  | . | 14 | 20 | . | 13 | . | . | 17 |
| *Sonchus bulbosus* (L.) N. Kilian & Greuter subsp. *bulbosus* |  | 63 | . | 10 | 60 | 27 | 67 | . | . |
| *Sonchus oleraceus* L. |  | 37 | 29 | 20 | 90 | 93 | 89 | . | 67 |
| *Sonchus tenerrimus* L. |  | 5 | 7 | . | . | 7 | . | . | . |
| *Spergula arvensis* L. | * | . | . | 10 | . | . | . | . | . |
| *Spergularia salina* J. & C. Presl |  | 5 | 14 | 20 | . | . | 11 | . | . |
| *Sporobolus virginicus* Kunth |  | 37 | . | 20 | . | . | . | . | . |
| *Stachys arvensis* (L.) L. |  | 16 | 14 | 30 | 100 | 87 | 22 | 20 | 83 |
| *Stellaria media* (L.) Vill. s.l. |  | 42 | 50 | . | 40 | 73 | 78 | 100 | 83 |
| *Stipa capensis* Thunb. |  | . | 7 | . | 10 | 20 | . | . | . |
| *Tamus communis* L. |  | . | . | . | . | 20 | 11 | 100 | 83 |
| *Teucrium marum* L. |  | 11 | . | . | . | . | 22 | . | . |
| *Theligonum cynocrambe* L. |  | 5 | . | . | 80 | 93 | 44 | 80 | 83 |
| *Thesium humile* Vahl | * | . | . | . | 10 | . | . | . | . |
| *Thymelaea hirsuta* (L.) Endl. |  | 53 | 14 | . | 10 | . | 22 | . | . |
| *Tolpis umbellata* Bertol. |  | 5 | 14 | 20 | 80 | 13 | 11 | . | . |
| *Torilis arvensis* (Huds.) Link s.l. |  | 5 | . | . | 30 | 73 | 22 | 20 | 83 |
| *Torilis nodosa* (L.) Gaertn. |  | 42 | 36 | 40 | 60 | 87 | 56 | 20 | 83 |
| *Trachynia distachya* (L.) Link |  | 42 | 7 | . | 90 | 100 | 67 | . | 100 |
| *Trifolium angustifolium* L. subsp. *angustifolium* |  | 47 | 71 | 80 | 50 | 33 | 22 | . | 50 |
| *Trifolium arvense* L. s.l. |  | . | . | . | 80 | 53 | . | . | 17 |
| *Trifolium bocconei* Savi |  | 5 | . | 10 | 20 | 7 | . | . | . |
| *Trifolium campestre* Schreb. |  | 84 | 71 | 70 | 100 | 100 | 56 | 60 | 50 |
| *Trifolium cherleri* L. |  | 32 | 64 | 20 | 20 | 13 | . | . | 17 |
| *Trifolium glomeratum* L. |  | 47 | 86 | 90 | 90 | 60 | 22 | . | 50 |
| *Trifolium incarnatum* L. s.l. |  | 21 | 7 | 10 | 20 | . | . | . | . |
| *Trifolium lappaceum* L. |  | 11 | 7 | 50 | . | . | . | 60 | . |
| *Trifolium ligusticum* Loisel. |  | . | . | 40 | . | 20 | . | 20 | 17 |
| *Trifolium micranthum* Viv. |  | . | . | 30 | . | . | . | . | . |
| *Trifolium nigrescens* Viv. subsp. *nigrescens* |  | . | 71 | 100 | . | . | . | . | 17 |
| *Trifolium ochroleucum* Huds. | * | . | . | . | . | 7 | . | . | . |
| *Trifolium resupinatum* L. |  | . | 21 | 60 | . | . | . | . | . |
| *Trifolium scabrum* L. subsp. scabrum |  | 89 | 100 | 30 | 70 | 40 | 67 | . | 17 |
| *Trifolium spumosum* L. |  | . | 21 | 30 | . | 13 | . | . | 17 |
| *Trifolium squarrosum* L. |  | . | 14 | 90 | . | . | . | . | 17 |
| *Trifolium stellatum* L. |  | 37 | 79 | 10 | 80 | 27 | 11 | . | 17 |
| *Trifolium subterraneum* L. s.l. |  | 32 | 86 | 90 | 30 | 40 | 11 | 60 | 50 |
| *Trifolium suffocatum* L. |  | 5 | 21 | 10 | . | 7 | . | . | . |
| *Trifolium tomentosum* L. |  | . | 71 | 40 | . | 7 | . | . | . |
| *Triglochin bulbosum* L. subsp. *barrelieri* (Loisel.) Rouy | * | . | . | 10 | . | . | . | . | . |
| *Triticum ovatum* (L.) Raspail |  | 42 | 7 | 10 | 20 | 13 | 22 | . | . |
| *Tuberaria guttata* (L.) Fourr. |  | 5 | . | . | 50 | 7 | . | . | . |
| *Umbilicus horizontalis* (Guss.) DC. | * | . | . | . | . | . | . | 20 | . |
| *Umbilicus rupestris* (Salisb.) Dandy |  | 21 | . | . | 10 | 53 | 33 | 60 | 33 |
| *Urospermum dalechampii* (L.) F.W. Schmidt |  | 5 | 64 | . | 10 | . | . | . | . |
| *Urospermum picroides* (L.) Scop. ex F.W. Schmidt |  | 11 | 14 | 10 | 70 | 93 | 44 | . | 83 |
| *Urtica membranacea* Poir. ex Savigny |  | . | . | . | . | . | 22 | 20 | 33 |
| *Urtica pilulifera* L. | * | . | . | . | . | . | . | 20 | . |
| *Valantia muralis* L. |  | 53 | . | . | . | . | 78 | . | . |
| *Valerianella microcarpa* Loisel. |  | 11 | . | . | 50 | . | . | . | . |
| *Veronica cymbalaria* Bodard s.l. |  | . | . | . | . | . | 11 | 40 | 17 |
| ***Vicia benghalensis* L.** |  | . | . | . | 30 | 13 | . | . | 17 |
| *Vicia disperma* DC. |  | . | . | . | 10 | . | . | 20 | . |
| *Vicia glauca* C. Presl subsp. *glauca* | * | . | . | . | . | 7 | . | . | . |
| ***Vicia hybrida* L.** |  | 5 | . | . | . | 20 | . | . | 17 |
| *Vicia lathyroides* L. |  | . | . | . | 10 | 7 | . | . | . |
| *Vicia lutea* L. | * | . | . | . | 10 | . | . | . | . |
| *Vicia sativa* L. subsp. *nigra* (L.) Ehrh. |  | 32 | 14 | 20 | 100 | 87 | 44 | 20 | 50 |
| *Vicia tetrasperma* (L.) Schreb. |  | . | . | . | 20 | 33 | . | . | . |
| *Vicia villosa* Roth s.l. | * | . | . | . | . | 7 | . | . | . |
| *Vulpia ligustica* (All.) Link |  | . | 57 | 40 | 10 | 7 | . | . | . |
| *Vulpia myuros* (L.) C.C. Gmel. |  | 16 | 36 | 30 | 50 | 7 | 11 | . | 33 |

**References**

Conti F, Abbate G, Alessandrini A, Blasi C, editors. 2005. An annotated checklist of the Italian vascular flora. Rome: Palombi Editori.

Pignatti S. 1982. Flora d’Italia. Bologna: Edagricole.
